# Supplementary material for: Preparation of Folate‐Conjugated Pluronic F127/Chitosan Core‐Shell Nanoparticles Encapsulating Doxorubicin for Breast Cancer Treatment
Source: Hindawi journal article supplement (doi:10.1155/2012/593878), 2012-01-01
Supplement: f1 [file 593878.f1.pdf]

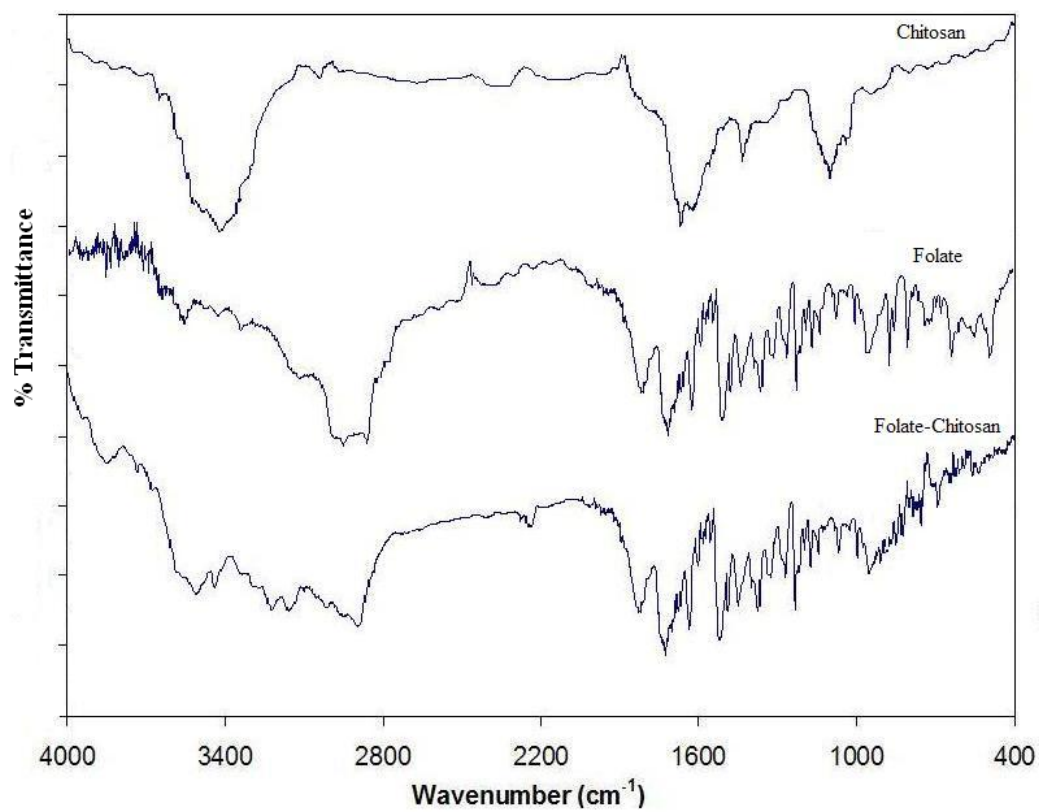

**Supplementary A** FTIR Spectra of chitosan, folate, and folate-conjugated chitosan.

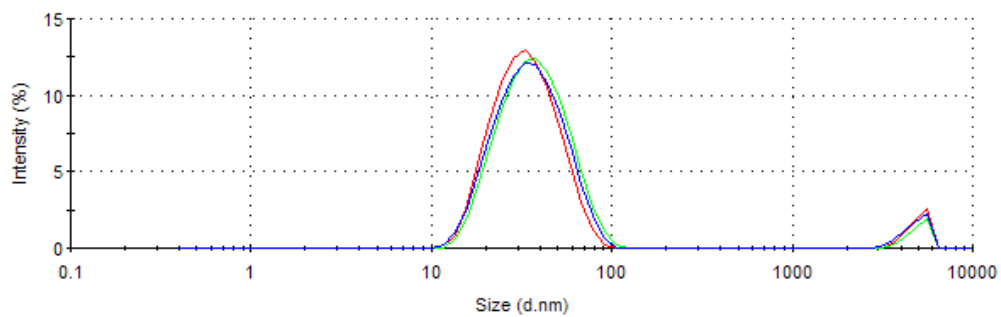

**Supplementary B** Size distribution of DOX-loaded micelles coated with folate-conjugated chitosan nanoparticles. Different lines represent different measurements.
